# Supplementary material for: WUSCHEL-related homeobox1 (WOX1) regulates vein patterning and leaf size in Cucumis sativus
Source: PubMed Central journal article supplement (PMC7603520; doi:10.1038/s41438-020-00404-y), 2020-11-01
Supplement: 41438_2020_404_MOESM2_ESM.pdf [file 41438_2020_404_MOESM2_ESM.pdf]

**Supplemental Table S2. RNA-Seq analysis of differentially expressed genes involved in organ development in the *mf* mutant compared with the wild-type**

| <b>Gene ID</b> | <b>log<sub>2</sub>FC</b> | <b>FDR</b> | <b>Putative functions</b>                        |
|----------------|--------------------------|------------|--------------------------------------------------|
| Csa3G895620    | -1.19                    | 6.59E-06   | Leucine-rich receptor-like protein kinase family |
| Csa4G043850    | -1.57                    | 4.21 E-03  | Homeobox-leucine zipper protein family           |
| Csa6G095280    | -5.02                    | 3.14 E-02  | Agamous-like MADS-box protein                    |
| Csa5G341040    | -1.43                    | 2.51 E-04  | Myb-like transcription factor REVEILLE 1-like    |
| Csa4G043850    | -1.57                    | 4.21 E-03  | homeobox-leucine zipper protein ATHB-21-like     |
| Csa5G630820    | 1.05                     | 3.28 E-02  | homeobox-leucine zipper protein HAT5-like        |
| Csa2G352950    | 1.18                     | 4.17E-05   | transcription factor RAX3-like                   |
| Csa3G183960    | 1.09                     | 1.62E-07   | transcription factor ASG4-like                   |
| Csa7G168060    | 2.5                      | 8.37 E-03  | transcription factor RADIALIS-like               |

**Supplemental Table S3. Cucumber genes analyzed in this study and their putative functions**

| Name in this study | Gene ID     | Annotation in CuGenDB ( <a href="https://cucurbitgenomics.org/">https://cucurbitgenomics.org/</a> ) |
|--------------------|-------------|-----------------------------------------------------------------------------------------------------|
| CsWOX1             | Csa1G042780 | WUSCHEL-related homeobox; contains IPR009057 (Homeodomain-like)                                     |
| CsPID1             | Csa1G537400 | Protein kinase; contains IPR011009 (Protein kinase-like domain)                                     |
| CsPID2             | Csa2G006100 | Kinase family protein; contains IPR011009 (Protein kinase-like domain)                              |
| CsPID2-like        | Csa4G064100 | Serine/threonine protein kinase, putative; contains IPR011009 (Protein kinase-like domain)          |
| CsPIN1             | Csa1G042820 | Auxin efflux carrier; contains IPR004776 (Auxin efflux carrier)                                     |
| CsPIN2             | Csa5G284520 | Auxin efflux carrier; contains IPR004776 (Auxin efflux carrier)                                     |
| CsPIN3             | Csa1G025070 | Auxin efflux carrier; contains IPR004776 (Auxin efflux carrier)                                     |
| CsPIN4             | Csa4G430820 | Auxin efflux carrier; contains IPR004776 (Auxin efflux carrier)                                     |
| CsPIN5             | Csa1G427480 | Auxin efflux carrier protein; contains IPR004776 (Auxin efflux carrier)                             |
| CsPIN6             | Csa5G576590 | Auxin efflux carrier; contains IPR004776 (Auxin efflux carrier)                                     |
| CsAUX1             | Csa4G308640 | Auxin transporter-like protein; contains IPR013057 (Amino acid transporter, transmembrane)          |
| CsLAX1             | Csa3G731880 | Auxin transporter-like protein; contains IPR013057 (Amino acid transporter, transmembrane)          |
| CsLAX2             | Csa7G010800 | Auxin transporter-like protein; contains IPR013057 (Amino acid transporter, transmembrane)          |
| CsLAX3             | Csa5G374730 | Auxin transporter-like protein; contains IPR013057 (Amino acid transporter, transmembrane)          |
| CsLAX4             | Csa2G264590 | Auxin transporter-like protein; contains IPR013057 (Amino acid transporter, transmembrane)          |
| CsLAX5             | Csa5G201310 | Auxin transporter-like protein; contains IPR013057 (Amino acid transporter, transmembrane)          |
| CsLAX6             | Csa6G011040 | Auxin transporter-like protein; contains IPR013057 (Amino acid transporter, transmembrane)          |
| CsTCP2a            | Csa6G524000 | TCP transcription factor; contains IPR005333 (Transcription factor, TCP)                            |
| CsTCP2b            | Csa1G025920 | TB1-like TCP family transcription factor; contains IPR005333 (Transcription factor, TCP)            |
| CsTCP4a            | Csa4G088720 | Transcription factor; contains IPR005333 (Transcription factor, TCP)                                |
| CsTCP4b            | Csa6G156050 | Transcription factor; contains IPR005333 (Transcription factor, TCP)                                |
| CsTCP4c            | Csa4G628330 | Transcription factor; contains IPR005333 (Transcription factor, TCP)                                |
| CsTCP4d            | Csa1G077150 | Transcription factor; contains IPR005333 (Transcription factor, TCP)                                |
| CsTCP5a            | Csa4G132680 | TB1-like TCP family transcription factor; contains IPR005333 (Transcription factor, TCP)            |
| CsTCP5b            | Csa1G014310 | Transcription factor; contains IPR005333 (Transcription factor, TCP)                                |
| CsTCP5c            | Csa1G039270 | TCP transcription factor; contains IPR005333 (Transcription factor, TCP)                            |

**Supplemental Table S4. The parameters of vein pattern in cucumber leaves of Fig. 5B**

| Leaf              | $\alpha$ Angle (°) | $\beta$ Angle (°) | Total length of primary vein | primary vein density (cm / cm <sup>2</sup> ) | Total length of secondary vein | Number of secondary vein | Average length of secondary vein | Secondary vein density (cm / cm <sup>2</sup> ) | Leaf area (cm <sup>2</sup> ) |
|-------------------|--------------------|-------------------|------------------------------|----------------------------------------------|--------------------------------|--------------------------|----------------------------------|------------------------------------------------|------------------------------|
| AM218             | 57.7±1.2           | 91.8±1.3          | 40.2±1.8                     | 0.62±0.04                                    | 71.4±2.8                       | 26±0                     | 2.75±0.11                        | 1.11±0.05                                      | 64.5±3.6                     |
| <i>rl</i>         | 31.8±0.8**         | 96.7±1.5**        | 29.2±1.6**                   | 0.44±0.02**                                  | 97.5±4.5**                     | 18±0**                   | 5.42±0.25**                      | 1.46±0.10**                                    | 66.8±3.7                     |
| <i>mf</i>         | 30.0±0.9**         | 67.2±1.6**        | 38.9±1.9                     | 1.14±0.09**                                  | 55.2±3.1**                     | 27±1**                   | 2.03±0.12**                      | 1.62±0.10**                                    | 34.2±2.5**                   |
| <i>CsWOX1</i> -OE | 41.2±0.8**         | 87.9±1.3**        | 19.6±1.2**                   | 0.76±0.07**                                  | 34.8±2.2**                     | 22±0**                   | 1.58±0.10**                      | 0.76±0.07**                                    | 25.9±2.5**                   |

Asterisks indicate a significant difference (t test, P < 0.01).

Supplemental Table S5. Primer sequences used in this study

| Primers           | Gene ID <sup>a</sup> | Forward primer (5' to 3')                              | Reverse primer (5' to 3')                                      |
|-------------------|----------------------|--------------------------------------------------------|----------------------------------------------------------------|
| I305.4-CsWOX1     | Csa1G042780          | ACGGGGGACTCTAGAGGATCCATGTGGATGATGGGTTACAAT             | CTGGTCACCAATTCACACGTGTTAGTGGTGGTGGTGGTGGTATTCTTCAATGGTAGGAATTC |
| BD-CsWOX1         | Csa1G042780          | ATGGCCATGGAGGCCGAATTCATGTGGATGATGGGTTACAATGAC          | ATGCGGCCCTGCAGGTCGACTCAATCTTCAATGGTAGGAATTC                    |
| BD-CsWOX1N        | Csa1G042780          | ATGGCCATGGAGGCCGAATTCATGTGGATGATGGGTTACAATGAC          | ATGCGGCCCTGCAGGTCGACACCACCACGGAGAGCAGCG                        |
| NE-CsWOX1         | Csa1G042780          | CCCAGGCCTACTAGTGGATCCATGTGGATGATGGGTTACAATGAC          | CCCAGGAGCGGTACCCCTCGAGTCAATCTTCAATGGTAGGAATTC                  |
| NE-CsWOX1N        | Csa1G042780          | CCCAGGCCTACTAGTGGATCCATGTGGATGATGGGTTACAATGAC          | CCCAGGAGCGGTACCCCTCGAGACCACCACGGAGAGCAGCG                      |
| AD-CSTCP4a        | Csa4G088720          | GTGGGCATCGATACGGGATCCATATGGGAGAGAGCCACCGC              | ACGATTCTATCGAGCTCGAGTCAATGGCGAGAATCAGAGGA                      |
| AD-CsAP2          | Csa6G491020          | GTGGGCATCGATACGGGATCCATATGGGAGAGAGCCACCGC              | ACGATTCTATCGAGCTCGAGTCAAGAGGGTCTCATAAGACAATGA                  |
| CRISPR-AiWOX1, 3  | At3G18010, AT2G28610 | TCGAAGTAGTGATTGGCGCAGATTCCCTCAACGGGTTTATAGAGCTAGAAATAG | TTCTAGCTCTAAAACCGTTGAAGCCACAGGACTCCAATCTTCTAGTCTACTAC          |
| pGREEN-P35-CsWOX1 | Csa1G042780          | GCCCAAGCTACGCTCTCGAGATGTGGATGATGGGTTACAATGAC           | TCCCCCGGGCTCGAGGAATTCATTCTTCAATGGTAGGAATTCAAAAG                |
| Check-HYG517      | --                   | TCGTTATGTTTATCGGCACCTT                                 | GATGTTGGCGACCTCGTATT                                           |
| Check-eGFP427     | --                   | TCCAGGAGCGCACCATCTT                                    | TCGTCCATGCCGTGAGTGA                                            |
| qCsActin2         | Csa6G484600          | ATTCTTGCATCTCTAAGTACCTTCC                              | CCAACATAAGGGAAATAACTCACC                                       |
| qCsWOX1           | Csa1G042780          | GGGGCAACAGATTGCAGGAC                                   | GGGCAATGTTTCATCATTAGTTGG                                       |
| qCsCLE5           | Csa4G627800          | ATGGCTAATTGTAGTGTAAAGCTG                               | GATAAACTTCAACATTTCTTCCG                                        |
| qCsCLE6           | Csa6G518900          | CTTAGCTTGTGGGTATGCCTGA                                 | CCCTCGTTGAGGAATGCTTC                                           |
| qCsPID1           | Csa1G537400          | TCATCCGTTTTGCTACACT                                    | ACTTCCGCTGCATAAAAACCT                                          |
| qCsPID2           | Csa2G006100          | CACGCTCCGACTCCATCTA                                    | GTCACCAATCCACTCCGC                                             |
| qCsPID2-like      | Csa4G064100          | GAGATTCTGGCTTCTTTGGACC                                 | GCAACAGAGAAGCGGCTACC                                           |
| qCsPIN1           | Csa1G042820          | GCTACAACAGGGGCAATG                                     | TCCTCTGTTTTCCCATTTGGC                                          |
| qCsPIN2           | Csa5G284520          | CTTTCAACTTTGCCGAATACG                                  | CAGAATCTTCGCTCCACGAT                                           |
| qCsPIN3           | Csa1G025070          | ATCATCGTTCGGTGTGCT                                     | TGAACCTTAAGTGCACAGA                                            |
| qCsPIN4           | Csa4G430820          | GAATGTACGGGACTCCACT                                    | ACAATCTCCCTGCAGTATCC                                           |
| qCsPIN5           | Csa1G427480          | GAGCTTCGAATCTACCCGGA                                   | CGTCGCTTGAAAACCTATTGG                                          |
| qCsPIN6           | Csa5G576590          | TCATTTCAATCCGGTGGCAT                                   | GGCAAAAGTAGCAACAGAGTTCC                                        |
| qCsAUX1           | Csa4G308640          | GGAAAGGAGGAAGGGGAAGA                                   | AGGCAGAGTCAAAAACCTG                                            |
| qCsLAX1           | Csa3G731880          | TTGTTAAAGGGCTATTGCGAG                                  | CAGCATATGAGCCATAGCAGG                                          |
| qCsLAX2           | Csa7G010800          | TTTGGTGTGGTGTGTTGGC                                    | GCCGTAGCATTGAACGATTG                                           |
| qCsLAX3           | Csa5G374730          | TTGGACCGATCAACTCGACA                                   | TTCACTGAGTACAGCCCTGCC                                          |
| qCsLAX4           | Csa2G264590          | GTCTACATCATCCCGCCC                                     | CACCAAGCCAAACCTACA                                             |
| qCsLAX5           | Csa5G201310          | GGGCTTGTGTGCCACTACT                                    | GAATGCTTCAACCCCTCGAC                                           |
| qCsLAX6           | Csa6G011040          | TCCCAACTGGGTATGCTCTC                                   | ACCCATCCAGCACTTCAAAC                                           |
| qCsTCP2a          | Csa6G524000          | TCCAGAACTCCGAAACAGC                                    | CGCGAAAGAGACAAACCTGA                                           |
| qCsTCP2b          | Csa1G025920          | CATCGGTGGAGTGTGGCTA                                    | AGCGACAGAAAGCCGAATC                                            |
| qCsTCP4a          | Csa4G088720          | AGGAGGCCACATTGTTCTGTT                                  | CAGCTTTACTGGGTCGGTCA                                           |
| qCsTCP4b          | Csa6G156050          | CACCAACTACCAATGGGAA                                    | TGAGCGGATAAACGAACAGC                                           |
| qCsTCP4c          | Csa4G628330          | GCTGGAGTGTGGATGGAGA                                    | GCGTGTAACTGGACTGAAGGG                                          |
| qCsTCP4d          | Csa1G077150          | CACAGTTCAGCTTACCCTTCC                                  | TCCCACATCGGAAAGAAAGG                                           |
| qCsTCP5a          | Csa4G132680          | TTCTCAGCCCTTTGAATAATGT                                 | TGAGATGATTGAAGGATGAAGGT                                        |
| qCsTCP5b          | Csa1G014310          | CCCTACCTCCTCCGTTTATGC                                  | TCAATCCACTTCCCTTTCGTC                                          |
| qCsTCP5c          | Csa1G039270          | CATTCTGATATTGGAGATGCTGC                                | GGGGCTGAATTAGTCTGATCG                                          |
| CsWOX1-sp6        | Csa1G042780          | GATTTAGGTGACACTATAGaatGCTGTCGACAAATGGAATCTTCAGC        | --                                                             |
| CsWOX1-T7         | Csa1G042780          | TGTAATACGACTACTATAGGGGAAAACAATGCAACAATTGCAAAA          | --                                                             |

<sup>a</sup> The gene ID is based on 9930 V2.0.
